# Supplementary material
Source: publisher figshare collection journal article supplement (https://sage.figshare.com/ndownloader/files/18514124)
Supplement: Supplementary file 1 [file 18514124]

**Supplementary tables for the manuscript titled “Study of awareness and practice of informed consent process among clinical trial participants and their motives behind participation”**

**Supplementary Table 1: Number of clinical trials in which the volunteers had participated**

| <b>No. Of Clinical Trials</b> | <b>N</b>   | <b>%</b>     |
|-------------------------------|------------|--------------|
| 1 to 3                        | 226        | 56.5         |
| 4 to 6                        | 152        | 38.0         |
| 7 to 9                        | 12         | 3.0          |
| ≥10                           | 10         | 3.5          |
| <b>Total</b>                  | <b>400</b> | <b>100.0</b> |

**Supplementary Table 2: Level of awareness about clinical trials among the study participants**

| <b>Level of awareness about clinical trials</b> |                                                                  |                  |                |
|-------------------------------------------------|------------------------------------------------------------------|------------------|----------------|
| <b>Awareness About Clinical Trial</b>           | <b>Number of ICD Contents Volunteer Enumerated by volunteers</b> | <b>Frequency</b> | <b>percent</b> |
| Poor awareness                                  | 0-4                                                              | 216              | 54.0           |
| Average awareness                               | 5-8                                                              | 173              | 43.2           |
| Good awareness                                  | 9-13                                                             | 11               | 2.8            |
| <b>Total</b>                                    |                                                                  | <b>400</b>       | <b>100.0</b>   |

**Supplementary Table 3: Mode of informed consent presentation done in earlier studies and suggested way of presentation of Informed Consent**

| <b>Mode Of Providing Information In Informed Consent Process</b> | <b>Mode of Information In ICP in Earlier Studies</b> |              | <b>Mode of Presentation of Information During ICP as suggested by the volunteers</b> |              |
|------------------------------------------------------------------|------------------------------------------------------|--------------|--------------------------------------------------------------------------------------|--------------|
|                                                                  | <b>N</b>                                             | <b>%</b>     | <b>N</b>                                                                             | <b>%</b>     |
| Verbal                                                           | 8                                                    | 2.0          | 22                                                                                   | 5.5          |
| Written copy given                                               | 22                                                   | 5.5          | 10                                                                                   | 2.5          |
| Video                                                            | 0                                                    | 0.0          | 60                                                                                   | 15.0         |
| Verbal and video both                                            | 0                                                    | 0.0          | 10                                                                                   | 2.5          |
| Verbal and written copy both                                     | 366                                                  | 92.3         | 90                                                                                   | 22.5         |
| All of them                                                      | 0                                                    | 0.0          | 208                                                                                  | 52.0         |
| <b>Total</b>                                                     | <b>396</b>                                           | <b>100.0</b> | <b>400</b>                                                                           | <b>100.0</b> |

**Supplementary Table 4: Interval between two consecutive studies the volunteer participated vs awareness of ideal minimum gap between two studies**

| Duration Between Two Studies for Participation in Clinical Trials | Minimum Duration of Interval Between Two Studies Volunteer had participated |              | Ideal Minimum Duration of Interval Between two Clinical Trials |              |
|-------------------------------------------------------------------|-----------------------------------------------------------------------------|--------------|----------------------------------------------------------------|--------------|
|                                                                   | N                                                                           | %            | n                                                              | %            |
| Less than 12 weeks                                                | 160                                                                         | 40.0         | 0                                                              | 0            |
| 12 weeks to One Year                                              | 232                                                                         | 58.0         | 398                                                            | 99.5         |
| More than One year                                                | 8                                                                           | 2.0          | 2                                                              | 0.5          |
| <b>Total</b>                                                      | <b>400</b>                                                                  | <b>100.0</b> | <b>400</b>                                                     | <b>100.0</b> |
